# Supplementary material
Source: publisher site journal article supplement (https://www.dovepress.com/article/291030)
Supplement: Supplementary file 1 [file get_supplementary_file.php]

# Comparison of dry-powder inhaler and pressurized metered-dose inhaler formulations of extrafine beclomethasone dipropionate/formoterol fumarate/glycopyrronium in patients with COPD: The TRI-D randomized controlled trial

Kai-Michael Beeh, Piotr Kuna, Massimo Corradi, Isabelle Viaud, Alessandro Guasconi, George Georges

# Supplement

## Supplemental methods

### Inclusion Criteria

Patients had to meet all of the following inclusion criteria to be eligible for enrolment into the study:

1. Age and informed consent: male and female adults (aged ≥40 and ≤85 years) with written informed consent obtained prior to any study-related procedure;
2. COPD diagnosis: established diagnosis of COPD (according to GOLD document updated 2017) at least 12 months prior to screening;
3. A post-bronchodilator FEV1 ≥30% and <80% of the predicted normal value and FEV1/FVC <0.7. Post-bronchodilator test was measured 10–15 minutes after the administration of 400 μg of salbutamol (4 x 100 μg);
4. A smoking history of at least 10 pack-years (pack-years = [number of cigarettes per day x number of years]/20). Current and ex-smokers were eligible. For ex-smokers, smoking cessation must have been completed more than 6 months prior to screening;
5. Previous medication: patients’ COPD therapy at screening with either:
   1. ICS/LABA/LAMA (free or fixed) combination;
   2. ICS/LABA (free or fixed) combination;
   3. Inhaled LABA/LAMA (free or fixed) combination;
   4. Inhaled LAMA;

If taken at stable regimen at least 30 days before screening;

1. Ability to comply with the protocol: patients had to have a cooperative attitude to comply with study procedures;
2. Ability to use the inhaler: patients had to have a cooperative attitude and the ability to be trained to use correctly the pMDI and DPI inhalers;

Inclusion criteria #6 and #7 were to be re-checked at the randomization visit.

### Exclusion Criteria

The presence of any of the following excluded a patient from study enrolment:

1. Pregnancy and lactation: pregnant or lactating women and women of childbearing potential with fertile male partners unless they and/or their partner were willing to use a highly effective birth control method from the signature of the informed consent and until the follow-up contact. Being of non-childbearing potential was defined as meeting, at least, one of the following criteria:
   1. At least 12 months of natural (spontaneous) amenorrhea with an appropriate clinical profile;
   2. Previous surgical sterilization;
2. Diagnosis of asthma: patients who had a current clinical diagnosis of asthma;
3. Respiratory disorders other than COPD that would have affected efficacy and safety evaluation or place the patient at risk. This could have included but was not limited to known: alpha 1-antitrypsine deficiency, active tuberculosis, bronchiectasis, sarcoidosis, lung fibrosis, pulmonary hypertension and interstitial lung disease;
4. Lung cancer or history of lung cancer: patients with a diagnosis of lung cancer or a history of lung cancer;
5. Cancer or history of cancer (other than lung): patients with active cancer or a history of cancer with less than 5 years disease free survival time (whether or not there was evidence of local recurrence or metastases). Localized carcinoma (eg basal cell carcinoma, in situ carcinoma of the cervix adequately treated) was acceptable;
6. Lung resection: patients with a history of lung volume resection;
7. Lower tract respiratory infection that required use of antibiotics within 6 weeks prior to screening or during the run-in period;
8. History of exacerbations: patients with a moderate or severe COPD exacerbation, ie resulting in the use of systemic corticosteroids (oral/intravenous [IV]/intramuscular [IM]) and/or antibiotics and/or need for hospitalization within 6 weeks prior to screening or during the run-in period;
9. Oxygen therapy: patients requiring long term (at least 12 hours daily) oxygen therapy for chronic hypoxemia;
10. Patients participating to a pulmonary rehabilitation program or completing such a program within 6 weeks prior to screening;
11. Cardiovascular diseases: patients who had clinically significant cardiovascular condition such as, but not limited to, unstable ischemic heart disease, New York Heart Association Class III/IV left ventricular failure, acute ischemic heart disease in the last year prior to study screening, history of sustained cardiac arrhythmias or sustained and non-sustained cardiac arrhythmias diagnosed in the last 6 months not controlled with therapy (sustained meant lasting more than 30 seconds and/or ending only with external action, and/or leading to hemodynamic collapse; non-sustained meant > 3 beats < 30 seconds, and/or ending spontaneously, and/or asymptomatic), impulse conduction high degree blocks, patients with implantable cardioverter defibrillator;
12. Atrial fibrillation (AF):
    1. Paroxysmal AF;
    2. Persistent: AF episode either lasted longer than 7 days or required termination by cardioversion, either with drugs or by direct current cardioversion within 6 months from screening;
    3. Long standing persistent: as defined by continuous AF diagnosed for less than 6 months with or without a rhythm control strategy;
    4. Permanent: for at least 6 months with a resting ventricular rate ≥ 100/minute controlled with a rate control strategy (ie selective β-blocker, calcium channel blocker, pacemaker placement, digoxin or ablation therapy);
13. ECG criteria: any clinically significant abnormal 12-lead ECG that affected efficacy or safety evaluation or placed the patients at risk. Male patients with a Fridericia’s corrected QT interval (QTcF) > 450 ms and female patients with a QTcF > 470 ms at screening were not eligible (not applicable to patients that had permanent AF and for patients who had a pacemaker);
14. Concurrent diseases: patients with medical history or who had a current diagnosis of narrow-angle glaucoma, symptomatic prostatic hypertrophy, urinary retention or bladder neck obstruction that would have prevented the use of anticholinergic agents;
15. Other concurrent diseases: patients who had a historical or current evidence of uncontrolled concurrent disease such as but not limited to hyperthyroidism, diabetes mellitus or other endocrine disease; hematological disease; autoimmune disorders (eg rheumatoid arthritis); significant renal impairment or other diseases/conditions that might have placed the patient at undue risk or potentially have compromised the results or interpretation of the study;
16. Laboratory abnormalities: patients with clinically significant laboratory abnormalities indicating a significant unstable concomitant disease that might have placed the patient at undue risk or potentially have compromised the results or interpretation of the study;
17. Patients with hypokalemia (serum potassium levels <3.5 mEq/L [or 3.5 mmol/L]) or uncontrolled hyperkalemia;
18. Alcohol/drug abuse: patients with a known or suspected history of alcohol and/or substance/drug abuse within 12 months prior to screening;
19. Participation to investigational study: patients who had received any investigational drug within the 30 days (60 days for biologics) before screening;
20. Hypersensitivity: history of hypersensitivity to any of the study treatments components or a history of other allergy that in the opinion of the Investigator contraindicated the patient’s participation;
21. Patients mentally or legally incapacitated or patients accommodated in an establishment as a result of an official or judicial order.

Exclusion criteria #7 and #8 were re-checked at the randomization visit.

# List of ethics committees

Bulgaria

- All sites: Ethics Committee for Multicenter Trials (MCEC), 8 Damyan Gruev street, 1303 Sofia

Czech Republic

- Etická komise Krajské nemocnice Liberec, a.s., Krajská nemocnice Liberec, a.s., Husova 357/10. Liberec I-Staré Město, 460 01 Liberec
- Etická komise Nemocnice Kyjov, příspěvková organizace, Nemocnice Kyjov, příspěvková organizace, Strážovská 1247/22, 69701 Kyjov

Germany

- All sites: Ethikkommission bei der Landesärztekammer Hessen, Im Vogelsgesang 3, 60488 Frankfurt am Main

Hungary

- All sites: Medical Research Council, Ethics Committee for Clinical Pharmacology (MRC ECCP), Alkotmány utca 25, H-1054 Budapest

Italy

- Comitato Etico per la Sperimentazione Clinica delle Province di Verona e Rovigo, c/o Servizio di Farmacia, Piazzale A. Stefani, 1 - 37126 Verona
- Comitato Etico Interaziendale, Azienda Ospedaliera di Alessandria, S.S. Antonio e Biagio e Cesare Arrigo, Via Venezia, 16 - 15121 Alessandria
- Comitato Etico Unico Regionale, c/o Direzione Scientifica Centro di Riferimento Oncologico, Istituto di ricovero e cura a carattere scientifico, Via Franco Gallini, 2 - 33081 Aviano (PN)
- Comitato Etico Area Vasta Nord-Ovest, c/o Azienda Ospedaliero-Universitaria Pisana, Via Roma, 67 - 56126 Pisa

Poland

- All sites: Komisja Bioetyczna Przy Uniwersytecie Medycznym w Łodzi, PI. Hallera 1B, 90-647 Łódz
